# Supplementary material for: Complementing the Eukaryotic Protein Interactome
Source: PubMed Central journal article supplement (PMC3688968; doi:10.1371/journal.pone.0066635), 2013-06-18

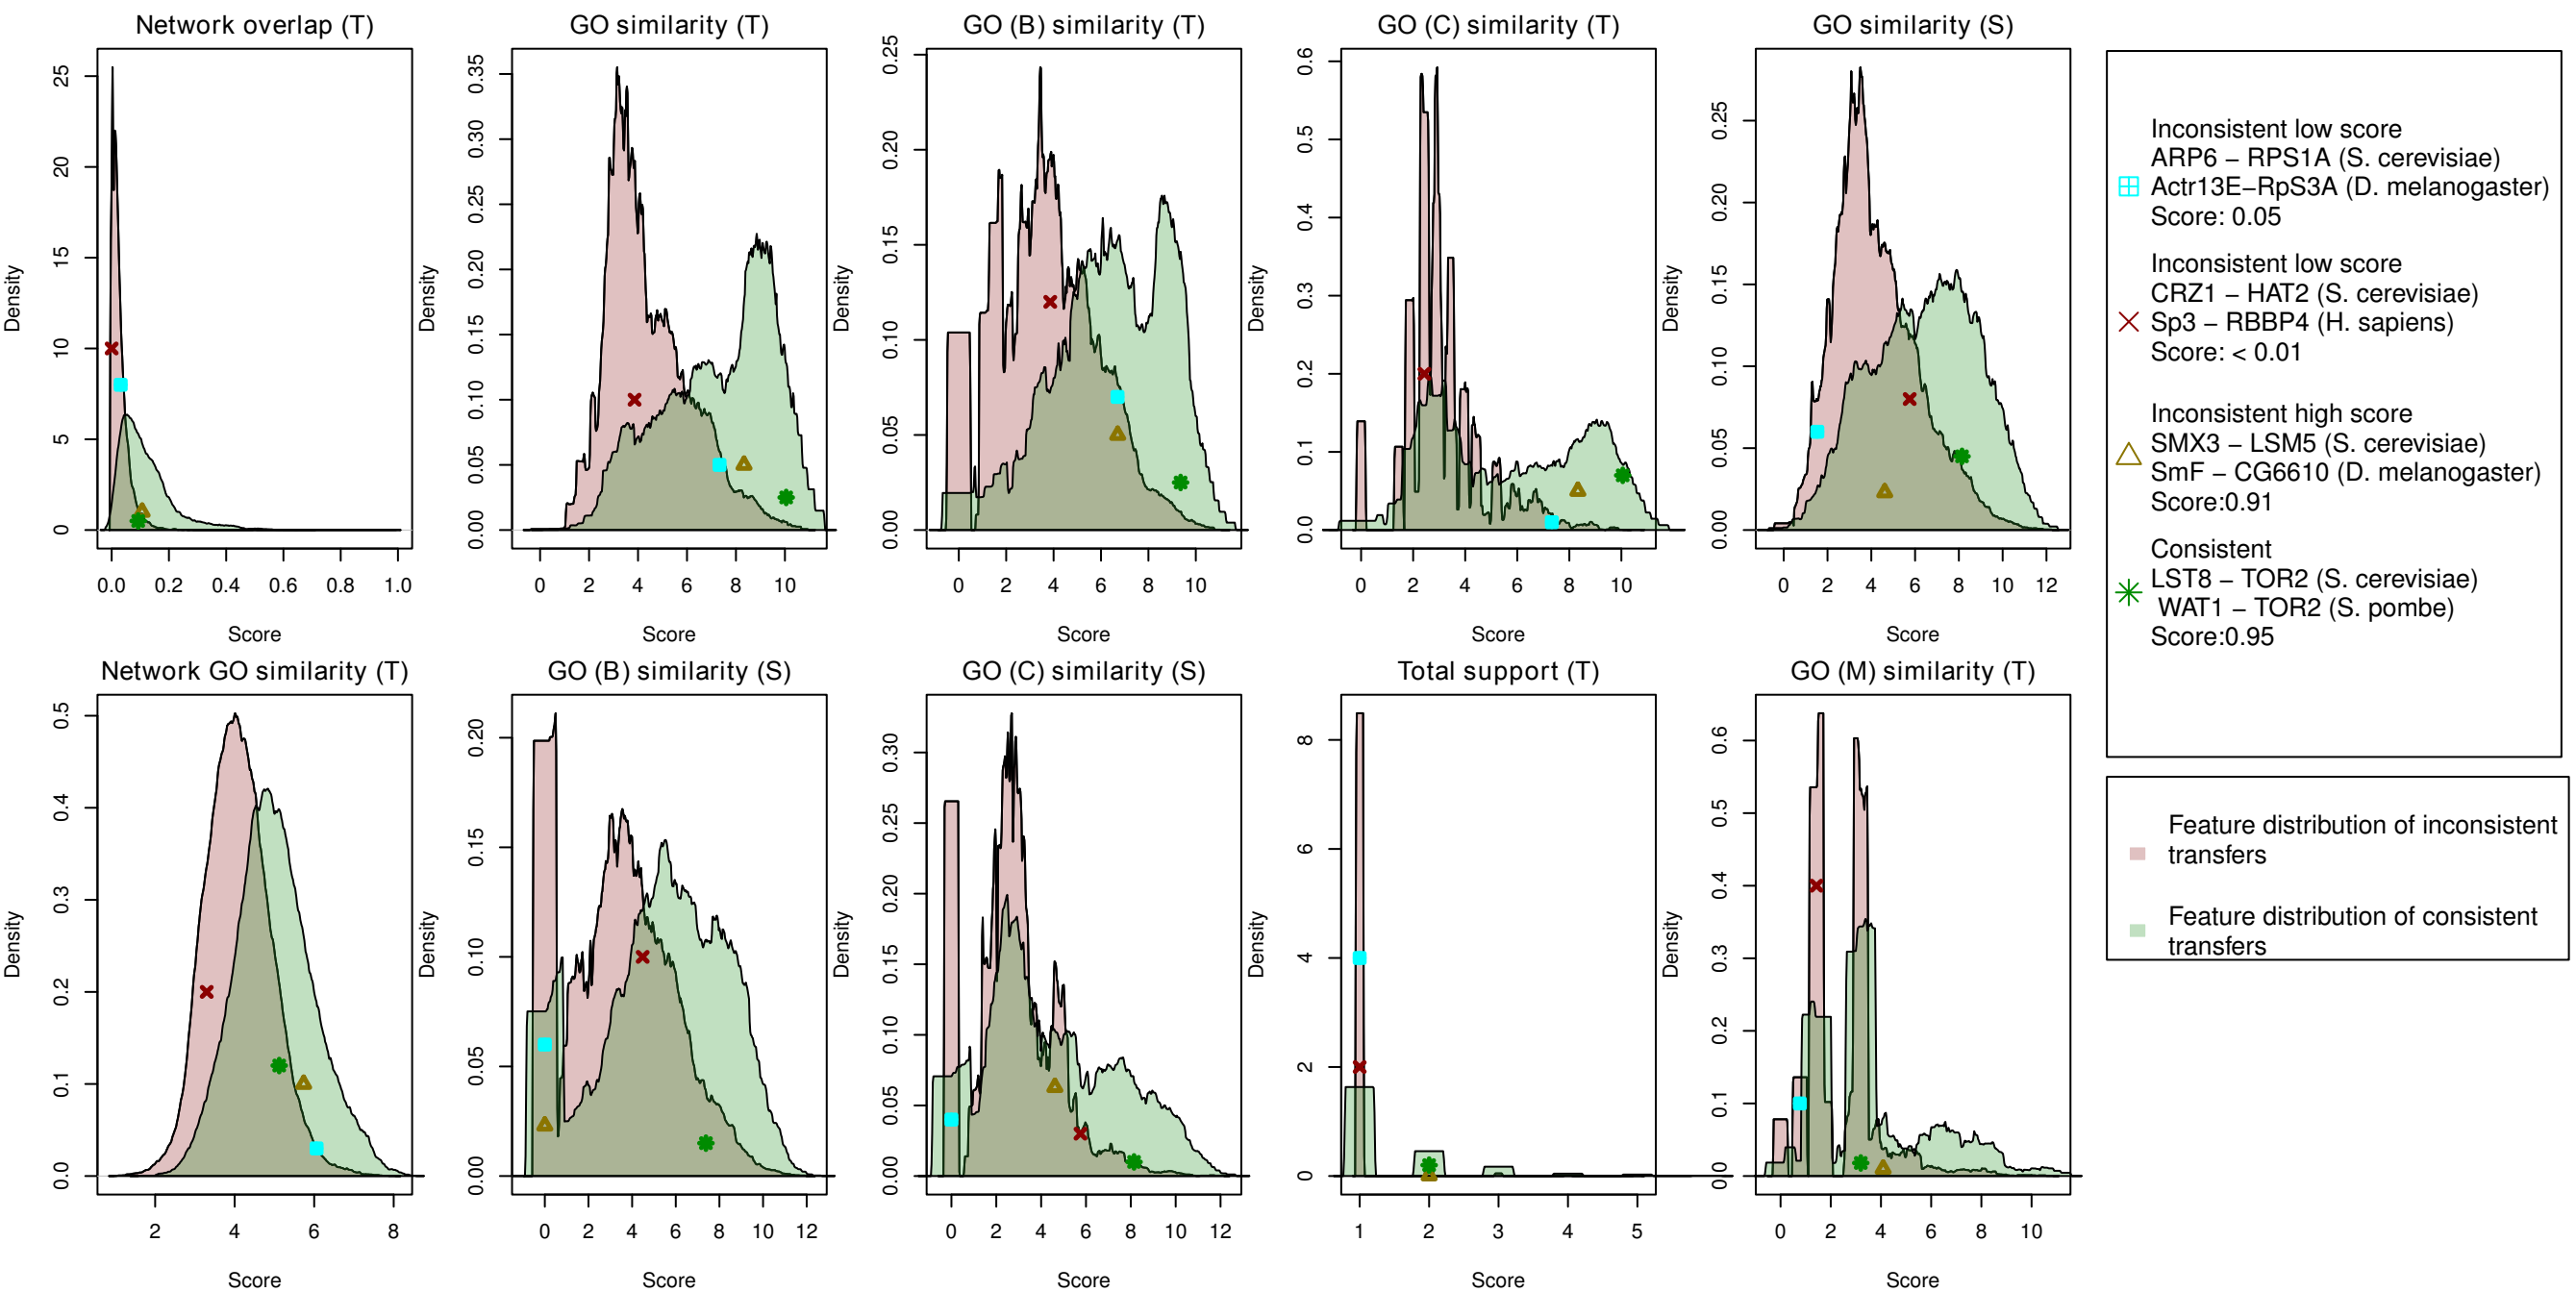

Supplement: pone.0066635.s004.pdf [file pone.0066635.s004.pdf]
